# Supplementary material for: Functional genomics identifies novel genes essential for clear cell renal cell carcinoma tumor cell proliferation and migration
Source: PubMed Central journal article supplement (PMC4170622; doi:10.18632/oncotarget.2097), 2014-06-12
Supplement: oncotarget-05-5320-s001.pdf [file oncotarget-05-5320-s001.pdf]

## Functional genomics identifies novel genes essential for clear cell renal cell carcinoma tumor cell proliferation and migration

### Supplementary Material

SF1. Summary of the 195 genes identified in the comparative marker selection. Genes are listed in alphabetical order.

| Genes examined  |               |                |                 |                 |
|-----------------|---------------|----------------|-----------------|-----------------|
| <i>ABCA1</i>    | <i>COL5A3</i> | <i>GMFG</i>    | <i>NAV1</i>     | <i>SEMA3F</i>   |
| <i>ABCG1</i>    | <i>COL6A2</i> | <i>GPR4</i>    | <i>NCF4</i>     | <i>SEMA6A</i>   |
| <i>ADM</i>      | <i>COP1</i>   | <i>GRIA4</i>   | <i>NDRG1</i>    | <i>SERINC3</i>  |
| <i>ALDOC</i>    | <i>CP</i>     | <i>HAPLN1</i>  | <i>NDUFA4L2</i> | <i>SERTAD2</i>  |
| <i>ALOX5</i>    | <i>CPE</i>    | <i>HEY1</i>    | <i>NETO2</i>    | <i>SETD2</i>    |
| <i>ANGPT2</i>   | <i>CSDA</i>   | <i>HIF1A</i>   | <i>NKG7</i>     | <i>SHMT2</i>    |
| <i>ANGPTL2</i>  | <i>CSPG4</i>  | <i>HIG2</i>    | <i>NNMT</i>     | <i>SIGLEC1</i>  |
| <i>ANGPTL4</i>  | <i>CTHRC1</i> | <i>HIPK2</i>   | <i>NOL3</i>     | <i>SLA</i>      |
| <i>APOC1</i>    | <i>CTSZ</i>   | <i>HK2</i>     | <i>NPIP</i>     | <i>SLAMF8</i>   |
| <i>APOLD1</i>   | <i>CXCR4</i>  | <i>HMCN1</i>   | <i>NPTX2</i>    | <i>SLC15A4</i>  |
| <i>ARHGAP25</i> | <i>DARS</i>   | <i>HPS3</i>    | <i>NR3C1</i>    | <i>SLC16A1</i>  |
| <i>ARL4A</i>    | <i>DDB2</i>   | <i>HSD3B7</i>  | <i>NUSAP1</i>   | <i>SLC16A3</i>  |
| <i>BHLHB3</i>   | <i>DDIT4</i>  | <i>IFI16</i>   | <i>OLFML2A</i>  | <i>SLC2A3</i>   |
| <i>BICD1</i>    | <i>DERL1</i>  | <i>IGFBP3</i>  | <i>P4HA1</i>    | <i>SLC6A3</i>   |
| <i>BIRC3</i>    | <i>DIRAS2</i> | <i>IKIP</i>    | <i>PCDH17</i>   | <i>SLCO2B1</i>  |
| <i>BTK</i>      | <i>DNM1</i>   | <i>IL12RB1</i> | <i>PDK1</i>     | <i>SOCS3</i>    |
| <i>C10orf10</i> | <i>EDNRA</i>  | <i>INHBB</i>   | <i>PECAM1</i>   | <i>SPAG4</i>    |
| <i>CIGALT1</i>  | <i>EFCAB3</i> | <i>IRX3</i>    | <i>PFKFB4</i>   | <i>SPIRE1</i>   |
| <i>CIQA</i>     | <i>EGFR</i>   | <i>ITGA5</i>   | <i>PFKP</i>     | <i>SSPN</i>     |
| <i>CIQB</i>     | <i>EGLN3</i>  | <i>KCNE4</i>   | <i>PGBD5</i>    | <i>ST8SIA4</i>  |
| <i>CIQC</i>     | <i>EHD2</i>   | <i>KCNJ2</i>   | <i>PGF</i>      | <i>STAMBPL1</i> |

|                                  |               |               |                |                 |
|----------------------------------|---------------|---------------|----------------|-----------------|
| <i>C20orf100</i>                 | <i>ELOVL2</i> | <i>KCNK3</i>  | <i>PHKA2</i>   | <i>STC2</i>     |
| <i>CA9</i>                       | <i>ENPP3</i>  | <i>KCNMA1</i> | <i>PLAG1</i>   | <i>TBLIXR1</i>  |
| <i>CAMK1D</i>                    | <i>ENTPD1</i> | <i>KISS1R</i> | <i>PLOD2</i>   | <i>TCF4</i>     |
| <i>CAVI</i>                      | <i>EPAS1</i>  | <i>KLF6</i>   | <i>PML</i>     | <i>TCF8</i>     |
| <i>CAV2</i>                      | <i>ERGIC1</i> | <i>KSRI</i>   | <i>PPP1R3C</i> | <i>TGFA</i>     |
| <i>CCND1</i>                     | <i>FABP5</i>  | <i>LAMA4</i>  | <i>PRKCDBP</i> | <i>TGFBI</i>    |
| <i>CDCA2</i>                     | <i>FABP6</i>  | <i>LAMP3</i>  | <i>PTPRC</i>   | <i>TMCC1</i>    |
| <i>CDH13</i>                     | <i>FABP7</i>  | <i>LAPTM5</i> | <i>RAPGEF5</i> | <i>TMEM45A</i>  |
| <i>CDH2</i>                      | <i>FCGR1A</i> | <i>LGI4</i>   | <i>RGS1</i>    | <i>TNFAIP6</i>  |
| <i>CENTA2</i>                    | <i>FCGR2A</i> | <i>LOXL2</i>  | <i>RGS5</i>    | <i>TNFSF13B</i> |
| <i>CEP290</i>                    | <i>FGD2</i>   | <i>LPCAT1</i> | <i>RNASE6</i>  | <i>TPSAB1</i>   |
| <i>CEP350</i>                    | <i>FLT1</i>   | <i>LRRK1</i>  | <i>RNASET2</i> | <i>TRAF3IP2</i> |
| <i>CHES1</i><br>( <i>FOXn3</i> ) | <i>FMNL2</i>  | <i>MAP3K6</i> | <i>RNF149</i>  | <i>TREM2</i>    |
| <i>CHST7</i>                     | <i>FPRL2</i>  | <i>MEF2C</i>  | <i>RUNX1</i>   | <i>TRIB3</i>    |
| <i>CMKOR1</i>                    | <i>FXYD5</i>  | <i>MET</i>    | <i>RUNX2</i>   | <i>TYROBP</i>   |
| <i>CMTM3</i>                     | <i>GAS2L3</i> | <i>MS4A6A</i> | <i>RUNX3</i>   | <i>VEGF</i>     |
| <i>COL1A1</i>                    | <i>GIT2</i>   | <i>MS4A7</i>  | <i>SCARB1</i>  | <i>ZNF395</i>   |
| <i>COL1A2</i>                    | <i>GJA7</i>   | <i>MYC</i>    | <i>SCD</i>     | <i>ZNF532</i>   |

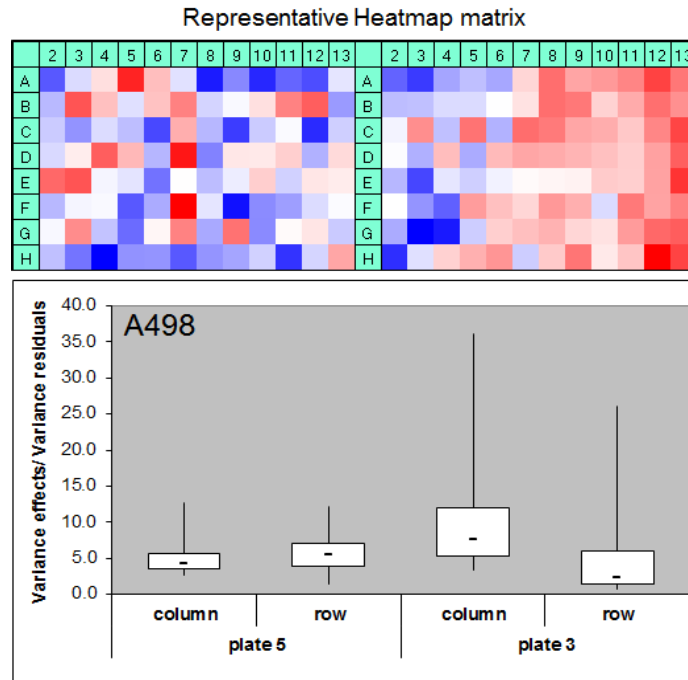

**SF2. Representative heatmap matrix for B-score justification.** Plate 5 represents an ideal normal distribution with common variance while plate 3 demonstrates uncommon variance and unevenly distributed data in need of median polishing for a B score, which is an analog of Z score.

**SF3 and 4. Gene array expression profile of ccRCC vs. normal renal tissue.** Fold change expression of tumor as compared to normal values are provided. Fold change inductions of 1.5 or greater where  $p \leq 0.05$  were considered to be significant.

| <i>ccRCC vs. normal kidney (n=8)</i> |                  |                    |                |
|--------------------------------------|------------------|--------------------|----------------|
| <b>Dataset</b>                       | <b>Gene</b>      | <b>Fold Change</b> | <b>P value</b> |
| Ooi, 2011                            | ADM              | 5.18               | 4.80E-06       |
|                                      | ANGPTL4          | 16                 | 5.80E-12       |
|                                      | BHLHB3 (BHLHE41) | 16.9               | 1.10E-07       |
|                                      | BTK              | 1.50               | 4.80E-05       |
|                                      | CAMK1D           | 1.43               | 6.20E-03       |
|                                      | CDH13            | 3.61               | 9.60E-06       |
|                                      | CEP290           | NA                 |                |
|                                      | C20ORF100 (TOX2) | NA                 |                |
|                                      | EDNRA            | 2.71               | 6.00E-04       |
|                                      | EFCAB3           | 3.1                | 1.70E-03       |
|                                      | EGFR             | 4.48               | 5.00E-04       |
|                                      | ENPP3            | 27.5               | 3.90E-08       |
|                                      | FXYD5            | 2.34               | 5.70E-06       |
|                                      | IGFBP3           | 6.6                | 8.40E-08       |
|                                      | KCNJ2            | 3.26               | 6.00E-04       |
|                                      | KISS1R           | 41.3               | 1.00E-04       |
|                                      | KSR1             | 2.87               | 1.30E-05       |
|                                      | LAMA4            | 5.43               | 1.70E-05       |
|                                      | LOXL2            | 5.35               | 2.90E-05       |
|                                      | MYC              | 3.17               | 1.00E-04       |
|                                      | NNMT             | 11.3               | 9.20E-07       |
|                                      | NPTX2            | 41.2               | 8.50E-05       |
|                                      | OLFML2A          | 3.3                | 4.60E-05       |
|                                      | PGBD5            | 2.6                | 3.30E-03       |
|                                      | PLOD2            | 2.84               | 5.80E-05       |
|                                      | RAPGEF5          | 2.59               | 1.00E-05       |
|                                      | SCD              | 7.51               | 5.10E-05       |
|                                      | SEMA6A           | 1.64               | 1.62E-02       |
|                                      | SSPN             | 2.71               | 1.00E-04       |
|                                      | TCF8 (ZEB1)      | 2.81               | 9.90E-05       |
|                                      | TMCC1            | 5.56               | 1.40E-07       |

| <i>ccRCC vs. normal kidney (n=10)</i> |                  |                    |                |
|---------------------------------------|------------------|--------------------|----------------|
| <b>Dataset</b>                        | <b>Gene</b>      | <b>Fold Change</b> | <b>P value</b> |
| Kort 2008                             | ADM              | 3.8                | 2.00E-06       |
|                                       | ANGPTL4          | 17                 | 1.00E-14       |
|                                       | BHLHB3 (BHLHE41) | 17.4               | 1.70E-13       |
|                                       | BTK              | 1.38               | 2.00E-04       |
|                                       | CAMK1D           | 1.53               | 4.00E-04       |
|                                       | CDH13            | 4.2                | 3.50E-06       |
|                                       | CEP290           | 1.26               | 1.01E-02       |
|                                       | C20ORF100 (TOX2) | 2.13               | 1.80E-03       |
|                                       | EDNRA            | 3.43               | 2.90E-06       |
|                                       | EFCAB3           | 2.7                | 2.00E-04       |
|                                       | EGFR             | 3.94               | 2.00E-04       |
|                                       | ENPP3            | 26.6               | 3.80E-11       |
|                                       | FXYD5            | 2.21               | 1.00E-07       |
|                                       | IGFBP3           | 7.13               | 8.90E-12       |
|                                       | KCNJ2            | 3.6                | 6.10E-05       |
|                                       | KISS1R           | 35.7               | 2.30E-06       |
|                                       | KSR1             | 3.3                | 2.20E-07       |
|                                       | LAMA4            | 7.12               | 6.20E-08       |
|                                       | LOXL2            | 5.09               | 2.00E-07       |
|                                       | MYC              | 3.38               | 1.80E-06       |
|                                       | NNMT             | 11                 | 1.20E-08       |
|                                       | NPTX2            | 33.6               | 1.10E-05       |
|                                       | OLFML2A          | 3.97               | 7.40E-07       |
|                                       | PGBD5            | 2.44               | 2.70E-05       |
|                                       | PLOD2            | 3.76               | 1.90E-07       |
|                                       | RAPGEF5          | 2.52               | 1.60E-08       |
|                                       | SCD              | 8.18               | 2.20E-11       |
|                                       | SEMA6A           | 2.86               | 1.00E-04       |
|                                       | SSPN             | 2.51               | 5.30E-07       |
|                                       | TCF8 (ZEB1)      | 3.14               | 4.20E-08       |
|                                       | TMCC1            | 5.87               | 2.40E-09       |

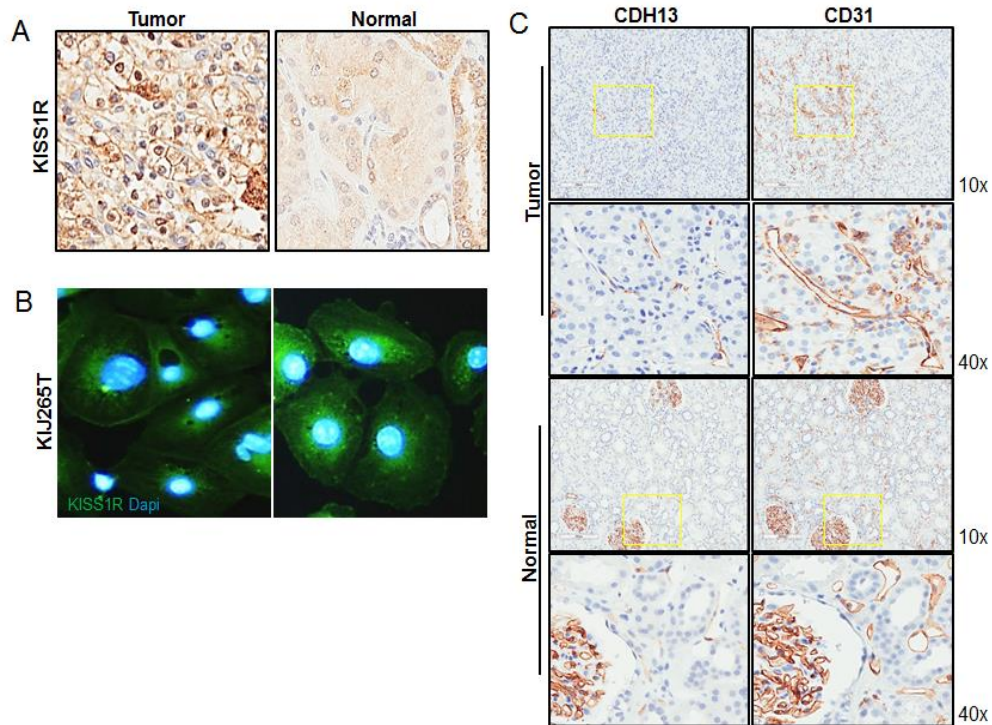

**SF5. *KISS1R* and *CDH13* protein expression in patient renal tissues.** (A) Comparison of *KISS1R* localization in ccRCC versus matched normal. Representative images are a 60x manual magnification. (B) Immunofluorescence of KIJ265T ccRCC cell for *KISS1R*. Image shown is a 100x manual magnification. (C) Evaluation of *CDH13* localization in patient tissue. Adjacent ccRCC and normal matched tissue samples were stained with *CDH13* and *CD31*. 10x images are shown, and boxed in areas represent a 40x manual zoom.
